# Supplementary material
Source: PubMed Central journal article supplement (PMC3337533)
Supplement: supp_ntr216_ntr216_Supplementary_Table_1.pdf [file supp_ntr216_ntr216_Supplementary_Table_1.pdf]

## SMOKELESS TOBACCO USE IN THE UNITED STATES MILITARY

**Table 1.** Summary of the 39 studies by ST user population variables reported, ST use level (definition and prevalence %) and concurrent use (definition and prevalence %).

| Study                                  | ST user population variables reported | ST use level definition                                                                                                                                                                                                                                                                                 | ST prevalence %                                                                                                                                                                         | Concurrent use definition          | Concurrent use %                                |
|----------------------------------------|---------------------------------------|---------------------------------------------------------------------------------------------------------------------------------------------------------------------------------------------------------------------------------------------------------------------------------------------------------|-----------------------------------------------------------------------------------------------------------------------------------------------------------------------------------------|------------------------------------|-------------------------------------------------|
| Ames, Cunradi, & Moore (2002)          | None reported                         | Current: used ST in the 30 days before entering BMT                                                                                                                                                                                                                                                     | 12%                                                                                                                                                                                     | Not applicable                     |                                                 |
| Bahrke, Poland, Baur, & Connors (1988) | Gender, age, length of ST use         | Daily/regular: not further specified                                                                                                                                                                                                                                                                    | Study 1: 8.2%<br>Study 3: 51.8%                                                                                                                                                         | Not applicable                     |                                                 |
| Ballweg & Bray (1989)                  | Gender, rank                          | Current: not further specified                                                                                                                                                                                                                                                                          | 9.5%                                                                                                                                                                                    | Cigarette smokers who also use ST  | 20.9%                                           |
| Burns & Williams (1995)                | Gender, age amount of ST used         | Current: not further specified                                                                                                                                                                                                                                                                          | 22%                                                                                                                                                                                     | ST users who also smoke cigarettes | 7%                                              |
| Chisick (2000)                         | None reported                         | Current: not further specified                                                                                                                                                                                                                                                                          | 31%                                                                                                                                                                                     | Not applicable                     |                                                 |
| Chisick, Poindexter, & York (1998)     | Gender, race/ethnicity, age           | Current: ST user if answered “yes” to: “Do you use chewing tobacco now?” or “Do you use snuff now?”                                                                                                                                                                                                     | Active duty: 15.9%<br>Recruits: 5.9%                                                                                                                                                    | Not applicable                     |                                                 |
| Cigrang, Severson, & Peterson (2002)   | Gender, age, amount of ST used        | Current: not further specified                                                                                                                                                                                                                                                                          | 100%                                                                                                                                                                                    | Not applicable                     |                                                 |
| Cooper et al. (2010)                   | None reported                         | Daily/regular: used regularly up to the beginning of BMT<br><br>Occasional: intermittent; used ST, but not every day<br><br>Experimental: used ST on 1-2 occasions<br><br>Former: used regularly but had quit in the past 6 months, quit between 6 months and 1 year ago, and quit more than 1 year ago | Light smokers:<br>2% daily/regular<br>5% occasional<br>24% experimental<br>4% former<br><br>Intermittent smokers:<br>7% daily/regular<br>7% occasional<br>22% experimental<br>4% former | Cigarette smokers who also use ST  | Light smokers: 31%<br>Intermittent smokers: 36% |

*Note.* BMT, basic military training; ST, smokeless tobacco.

# SMOKELESS TOBACCO USE IN THE UNITED STATES MILITARY

**Table 1.** (Continued)

| Study                                                 | ST user population variables reported                                                                                                   | ST use level definition                                                                                                          | ST prevalence %                        | Concurrent use definition                                        | Concurrent use %                                        |
|-------------------------------------------------------|-----------------------------------------------------------------------------------------------------------------------------------------|----------------------------------------------------------------------------------------------------------------------------------|----------------------------------------|------------------------------------------------------------------|---------------------------------------------------------|
| Daly & Pierson (1990)                                 | Gender, race/ethnicity, hometown population size, geographic region of origin, amount of ST used, frequency of ST use, length of ST use | Current: current use of ST (regardless of amount)                                                                                | Chew users: 12.2%<br>Snuff users: 9%   | ST users who also smoke cigarettes                               | 64.4% (all users included)                              |
| Ebbert et al. (2006)                                  | Gender, race/ethnicity, age, marital status, education level                                                                            | Experimental: chewed tobacco or snuff only on 1 or 2 occasions in the past                                                       | 18.5%                                  | Cigarette smokers who also use ST                                | 54.6%                                                   |
| Fitzpatrick & Shannon (1992)                          | Gender                                                                                                                                  | Current: not further specified                                                                                                   | Aircrew: 19%<br>Support personnel: 15% | Not applicable                                                   |                                                         |
| Forgas, Meyer, & Cohen (1996)                         | None reported                                                                                                                           | Current: not further specified                                                                                                   | 23.8%                                  | Not applicable                                                   |                                                         |
| Grasser & Childers (1997)                             | Gender, age, rank, length of ST use, ST quitting intentions                                                                             | Current: not further specified<br>Former: not further specified                                                                  | 7%<br>7%                               | Users of both ST and cigarettes (primary product not identified) | 7.9%                                                    |
| Grier, Knapik, Canada, Canham-Chervak, & Jones (2010) | Gender, rank, amount of ST used                                                                                                         | Daily/regular: frequent users; used ST on at least 20 of 30 days prior to BCT<br>Occasional: used ST in the 30 days prior to BCT | 9.7%<br>4.5%                           | ST users who also smoke cigarettes                               | 59.5% (daily/regular users)<br>68.6% (occasional users) |
| Haddock, Klesges, Talcott, Lando, & Stein (1998)      | Gender                                                                                                                                  | Current: not further specified                                                                                                   | 4.6%                                   | Cigarette smokers who also use ST                                | 4.6%                                                    |

*Note.* BCT, basic combat training; ST, smokeless tobacco.

## SMOKELESS TOBACCO USE IN THE UNITED STATES MILITARY

**Table 1.** (Continued)

| Study                                      | ST user population variables reported                                                                  | ST use level definition                                                 | ST prevalence %                                                          | Concurrent use definition          | Concurrent use % |
|--------------------------------------------|--------------------------------------------------------------------------------------------------------|-------------------------------------------------------------------------|--------------------------------------------------------------------------|------------------------------------|------------------|
| Haddock et al. (2001)                      | Gender, race/ethnicity, age, marital status, education level, income level                             | Current: using ST at least once per day                                 | 5.1%                                                                     | ST users who also smoke cigarettes | 26.6%            |
|                                            |                                                                                                        | Former: past users; not further specified                               | 2.5%                                                                     |                                    |                  |
| Hepburn, Johnson, Ward, & Longfield (2000) | Education level, rank                                                                                  | Daily/regular: not further specified                                    | 7.3%                                                                     | Not applicable                     |                  |
| Kao, Schneider, & Hoffman (2000)           | Gender, age, rank                                                                                      | Daily/regular: heavy chewer; chewed approximately daily                 | 1992 WHS:<br>8.9% daily/regular<br>8.7% occasional                       | Not applicable                     |                  |
|                                            |                                                                                                        | Occasional: moderate chewer; chewed once per month to 5-6 days per week | 14.4% experimental                                                       |                                    |                  |
|                                            |                                                                                                        | Experimental: light chewer; chewed 1 to 11 days per year                | 1995 WHS:<br>9.5% daily/regular<br>8.8% occasional<br>18.1% experimental |                                    |                  |
| Kenny Regennitter, & Quigley (1996)        | Gender, race/ethnicity, age, education level, amount of ST used, frequency of ST use, length of ST use | Daily/regular: used daily or almost daily                               | 10%                                                                      | Not applicable                     |                  |
|                                            |                                                                                                        | Occasional: not further specified                                       | 7%                                                                       |                                    |                  |
|                                            |                                                                                                        | Experimental: tried ST; not further specified                           | 24%                                                                      |                                    |                  |
|                                            |                                                                                                        | Former: formerly used it, but now no longer do so                       | 9%                                                                       |                                    |                  |

*Note.* ST, smokeless tobacco; WHS, Worldwide Survey of Health Related Behaviors.

## SMOKELESS TOBACCO USE IN THE UNITED STATES MILITARY

**Table 1.** (Continued)

| Study                                                      | ST user population variables reported                      | ST use level definition                                                                                                                                                                           | ST prevalence %                                                                                                                                                                                                                                                                  | Concurrent use definition                                        | Concurrent use %                  |
|------------------------------------------------------------|------------------------------------------------------------|---------------------------------------------------------------------------------------------------------------------------------------------------------------------------------------------------|----------------------------------------------------------------------------------------------------------------------------------------------------------------------------------------------------------------------------------------------------------------------------------|------------------------------------------------------------------|-----------------------------------|
| Klesges et al. (2006)                                      | None reported                                              | Daily/regular: used regularly up to the beginning of BMT<br><br>Experimental: used on only 1-2 occasions<br><br>Former: used at least once per day, but had quit for at least 6 months before BMT | ST intervention:<br>71.5% daily/regular<br>28.4% former<br><br>Smoking intervention:<br>14.3% daily/regular<br>24.7% experimental<br>5.7% former<br><br>Prevention intervention:<br>9.6% experimental<br><br>Control:<br>7.1% daily/regular<br>17.4% experimental<br>2.5% former | Not applicable                                                   |                                   |
| Klesges, Sherill-Mittleman, Ebbert, Talcot, & DeBon (2010) | None reported                                              | Current: combined daily (used every day) and occasional (used but not used every day) use categories                                                                                              | 3.7%                                                                                                                                                                                                                                                                             | Users of both ST and cigarettes (primary product not identified) | 4.8%                              |
| Knapik, Barson, & Reynolds (1999)                          | None reported                                              | Daily/regular: not further specified                                                                                                                                                              | 13.9%                                                                                                                                                                                                                                                                            | Not applicable                                                   |                                   |
| Lando, Haddock, Klesges, Talcott, & Jensen (1999)          | Gender, race/ethnicity, age, education level, income level | Daily/regular: at least once per day; history of regular use up to entering BMT<br><br>Experimental: not further specified<br><br>Former: not further specified                                   | 4.6%<br><br>17.1%<br><br>3.6%                                                                                                                                                                                                                                                    | Cigarette smokers who also use ST                                | 41.8% (among daily/regular users) |

*Note.* BMT, basic military training; ST, smokeless tobacco.

## SMOKELESS TOBACCO USE IN THE UNITED STATES MILITARY

**Table 1.** (Continued)

| Study                                                | ST user population variables reported                                                                                                          | ST use level definition                                                                                 | ST prevalence %                                                                    | Concurrent use definition                                        | Concurrent use % |
|------------------------------------------------------|------------------------------------------------------------------------------------------------------------------------------------------------|---------------------------------------------------------------------------------------------------------|------------------------------------------------------------------------------------|------------------------------------------------------------------|------------------|
| Martin, Brown, Eifler, & Houston (1999)              | Gender, age, amount of ST used, frequency of ST use, length of ST use                                                                          | Current: a person who had used ST regularly (at least once per day), right up the point of starting BMT | 9.9%                                                                               | ST users who also smoke cigarettes                               | 40%              |
| McClellan, Olde, Freeman, Mann, Rotruck (1999)       | Gender, age, rank, ST quitting intentions                                                                                                      | Current: any ST use in the past 30 days<br>Former: used ST one or more times more than 30 days ago      | 13.1%<br>30.6%                                                                     | Not applicable                                                   |                  |
| Morgan (2001)                                        | Gender                                                                                                                                         | Current: not further specified                                                                          | 22%                                                                                | Users of both ST and cigarettes (primary product not identified) | 27%              |
| Peterson et al. (2007)                               | Gender, race/ethnicity, age, marital status, education, rank, amount of ST used, frequency of ST use, length of ST use, ST quitting intentions | Current: not further specified                                                                          | 100%                                                                               | ST users who also smoke cigarettes                               | 20%              |
| Reynolds, Williams, Miller, Mathis, & Dettori (2000) | Gender                                                                                                                                         | Lifetime: ST use within the past year                                                                   | 43.1%                                                                              | Not applicable                                                   |                  |
| Rice, Mays, & Gable (2009)                           | None reported                                                                                                                                  | Current: ST use in the last 30 days                                                                     | 187 <sup>th</sup> medical battalion: 3%<br>232 <sup>nd</sup> medical battalion: 3% | Not applicable                                                   |                  |
| Severson et al. (2009)                               | Gender, race/ethnicity, age, marital status, education, rank, amount of ST used, frequency of ST use, length of ST use, ST quitting intentions | Current: not further specified                                                                          | 100%                                                                               | ST users who also smoke cigarettes                               | 20.2%            |

*Note.* BMT, basic military training; ST, smokeless tobacco.

## SMOKELESS TOBACCO USE IN THE UNITED STATES MILITARY

**Table 1.** (Continued)

| Study                                    | ST user population variables reported | ST use level definition                                                                                                                                      | ST prevalence % | Concurrent use definition                                        | Concurrent use % |
|------------------------------------------|---------------------------------------|--------------------------------------------------------------------------------------------------------------------------------------------------------------|-----------------|------------------------------------------------------------------|------------------|
| Shipley, Tresch, Tracey, & Wilcox (2002) | Gender, amount of ST used             | Current: not further specified                                                                                                                               | 9.6%            | Not applicable                                                   |                  |
| Smith & Fiore (1999)                     | None reported                         | Current: not further specified                                                                                                                               | 13.2%           | Not applicable                                                   |                  |
| Sridhar et al. (2003)                    | Amount of ST used                     | Current: not further specified                                                                                                                               | 50%             | Not applicable                                                   |                  |
| Trent, Hilton, & Melcer (2007)           | Gender, rank, frequency of ST use     | Lifetime: used ST at least 20 times in lifetime                                                                                                              | 26.1%           | Users of both ST and cigarettes (primary product not identified) | 18.4%            |
| Vander Weg et al. (2005)                 | Gender, geographic region of origin   | Current: combined daily (chewed tobacco or snuff every day) and occasional (chewed tobacco or snuff occasionally, but not every day) use categories          | .4%             | Not applicable                                                   |                  |
|                                          |                                       | Experimental: chewed tobacco or snuff only on one or two occasions in the past                                                                               | 6.6%            |                                                                  |                  |
|                                          |                                       | Former: chewed tobacco or snuff regularly (at least once per day), but quit in the past 6 months, between 6 months and one year ago, or more than a year ago | .2%             |                                                                  |                  |

*Note.* ST, smokeless tobacco.

## SMOKELESS TOBACCO USE IN THE UNITED STATES MILITARY

**Table 1.** (Continued)

| ST use level definition                                | ST use level definition                                                    | ST use level definition                                                                                                                                                                                                                                                                                    | ST use level definition | ST use level definition                                          | ST use level definition |
|--------------------------------------------------------|----------------------------------------------------------------------------|------------------------------------------------------------------------------------------------------------------------------------------------------------------------------------------------------------------------------------------------------------------------------------------------------------|-------------------------|------------------------------------------------------------------|-------------------------|
| Vander Weg, Klesges, & DeBon (2005)                    | None reported                                                              | Daily/regular: chewed tobacco or snuff every day                                                                                                                                                                                                                                                           | 2.4%                    | Not applicable                                                   |                         |
|                                                        |                                                                            | Occasional: chewed tobacco or snuff occasionally, but not every day                                                                                                                                                                                                                                        | 1.2%                    |                                                                  |                         |
|                                                        |                                                                            | Experimental: chewed tobacco or snuff only on one or two occasions in the past                                                                                                                                                                                                                             | 11.2%                   |                                                                  |                         |
|                                                        |                                                                            | Former: chewed tobacco or snuff regularly (at least once per day), but quit in the past 6 months, between 6 months and one year ago, or more than a year ago                                                                                                                                               | 1.5%                    |                                                                  |                         |
| Vander Weg et al. (2008)                               | Gender, race/ethnicity, age, marital status, education level, income level | Current: combined daily (used every day) and occasional (used but not used every day) use categories                                                                                                                                                                                                       | 6.7%                    | Not applicable                                                   |                         |
|                                                        |                                                                            | Lifetime: combined experimental (used ST only on one or two occasions in the past), regular (used at least once per day), and former (chewed tobacco or snuff regularly (at least once per day), but quit in the past 6 months, between 6 months and one year ago, or more than a year ago) use categories | 26%                     |                                                                  |                         |
| Ward et al. (2003)                                     | None reported                                                              | Daily/regular: used ST regularly and used right up to the point of entering BMT                                                                                                                                                                                                                            | 4.1%                    | Cigarette smokers who also use ST                                | 4.5%                    |
| Williams, Hermes, Gackstetter, Lando, & Fiedler (1996) | Gender, amount of ST used                                                  | Lifetime: history of ST use prior to entering BMT                                                                                                                                                                                                                                                          | 7.9%                    | Users of both ST and cigarettes (primary product not identified) | 8.3%                    |

*Note.* BMT, basic military training; ST, smokeless tobacco.

## SMOKELESS TOBACCO USE IN THE UNITED STATES MILITARY

### References

- Ames, G. M., Cunradi, C. B., & Moore, R. S. (2002). Alcohol, tobacco, and drug use among young adults prior to entering the military. *Prevention Science, 3*, 135-144. doi:10.1023/A:1015435401380
- Bahrke, M. S., Baur, T. S., Poland, D. F., & Connors, D. F. (1988). Tobacco use and performance on the U.S. Army physical fitness test. *Military Medicine, 153*, 229-235. Retrieved from <http://psycnet.apa.org>
- Ballweg, J. A. & Bray, R. M. (1989). Smoking and tobacco use by U.S. military personnel. *Military Medicine, 154*, 165-168. Retrieved from <http://psycnet.apa.org>
- Burns, J. C. & Williams, L. N., Jr. (1995). A survey to determine the knowledge of military members about the hazards of tobacco use, and a resulting tobacco-hazard education project. *Journal of Cancer Education, 10*, 37-40. doi:10.1080/08858199509528326
- Chisick, M. C. (2000). Do military dentists advise tobacco users to quit? The patient's perspective. *Public Health, 114*, 129-132. doi:10.1038/sj.ph.1900622
- Chisick, M. C., Poindexter, F. R., & York, A. K. (1998). Comparing tobacco use among incoming recruits and military personnel on active duty in the United States. *Tobacco Control, 7*, 236-240. doi:10.1136/tc.7.3.236
- Cigrang, J. A., Severson, H. H., & Peterson, A. L. (2002). Pilot evaluation of a population-based health intervention for reducing use of smokeless tobacco. *Nicotine & Tobacco Research, 4*, 127-131. doi:10.1080/14622200110101603
- Cooper, T.V., Taylor, T., Murray, A., DeBon, M.W., Vander Weg, M., Klesges, R. C., & Talcott, G. W. (2010). Differences between intermittent and light daily smokers in a population of U.S. military recruits. *Nicotine & Tobacco Research, 12*, 465-473. doi:10.1093/ntr/ntq025
- Daly, M. B., & Pierson, W. (1990). The use of smokeless tobacco among basic airmen. *American Journal of Health Promotion, 4*, 266-269. Retrieved from <http://psycnet.apa.org>
- Ebbert, J. O., Haddock, C. K., Vander, W. M., Klesges, R. C., Poston, W. S., & DeBon, M. (2006). Predictors of smokeless tobacco initiation in a young adult military cohort. *American Journal of Health Behavior, 30*, 103-112. doi:10.5555/ajhb.2006.30.1.103



## SMOKELESS TOBACCO USE IN THE UNITED STATES MILITARY

Fitzpatrick, D. T., & Shannon, S. (1992). Health-risk behaviors of Army aircrew. *Journal of Occupational Medicine*, *34*, 810-814. Retrieved from

<http://journals.lww.com>

Forgas, L. B., Meyer, D. M., & Cohen, M. E. (1996). Tobacco use habits of naval personnel during Desert Storm. *Military Medicine*, *161*, 165-168. Retrieved from

<http://www.ncbi.nlm.nih.gov>

Grasser, J. A., & Childers, E. (1997). Prevalence of smokeless tobacco use and clinical oral leukoplakia in a military population. *Military Medicine*, *162*, 401-404.

Retrieved from <http://www.ncbi.nlm.nih.gov>

Grier, T., Knapik, J. J., Canada, S., Canham-Chervak, M., & Jones, B. H. (2010). Tobacco use prevalence and factors associated with tobacco use in new U.S.

Army personnel. *Journal of Addictive Diseases*, *29*, 284-293. doi:10.1080/10550887.2010.489445

Haddock, C. K., Klesges, R. C., Talcott, G. W., Lando, H., & Stein, R. J. (1998). Smoking prevalence and risk factors for smoking in a population of United States

Air Force basic trainees. *Tobacco Control*, *7*, 232-235. doi:10.1136/tc.7.3.232

Haddock, C. K., Vander Weg, M., DeBon, M., Klesges, R. C., Talcott, G. W., Lando, H., & Peterson, A. (2001). Evidence that smokeless tobacco use is a gateway

for smoking initiation in young adult males. *Prevention Medicine*, *32*, 262-267. doi:10.1006/pmed.2000.0802

Hepburn, M. J., Johnson, J. M., Ward, J. A., & Longfield, J. N. (2000). A survey of smoking cessation knowledge, training, and practice among U.S. Army general

medical officers. *American Journal of Preventive Medicine*, *18*, 300-304. doi:10.1016/S0749-3797(00)00123-9

Kao, T. C., Schneider, S. J., & Hoffman, K. J. (2000). Co-occurrence, alcohol, smokeless tobacco, cigarette, and illicit drug use by lower ranking military

personnel. *Addictive Behaviors*, *25*, 253-262. doi:10.1016/S0306-4603(99)00062-3

Kenny, K. K., Quigley, N. C., & Regennitter, F. J. (1996). Survey of smokeless tobacco use in basic trainees and armor basic course officers. *Military Medicine*,

*161*, 37-42. Retrieved from <http://www.ncbi.nlm.nih.gov>

Klesges, R. C., DeBon, M., Vander Weg, M. W., Haddock, C. K., Lando, H. A., Relyea, ... Talcott, W. G. (2006). Efficacy of a tailored tobacco control program

on long-term use in a population of U.S. military troops. *Journal of Consulting and Clinical Psychology*, *74*, 295-306. doi:10.1037/0022-006X.74.2.295

## SMOKELESS TOBACCO USE IN THE UNITED STATES MILITARY

- Klesges, R. C., Sherrill-Mittleman, D., Ebbert, J. O., Talcott, G. W., & DeBon, M. (2010). Tobacco use harm reduction, elimination, and escalation in a large military cohort. *American Journal of Public Health, 100*, 2487-2492. doi:10.2105/AJPH.2009.175091
- Knapik, J. J., Reynolds, K., & Barson, J. (1999). Risk factors for foot blisters during road marching: tobacco use, ethnicity, foot type, previous illness, and other factors. *Military Medicine, 164*, 92-97. Retrieved from <http://www.ncbi.nlm.nih.gov>
- Lando, H. A., Haddock, C. K., Klesges, R. C., Talcott, G. W., & Jensen, J. (1999). Smokeless tobacco use in a population of young adults. *Addictive Behaviors, 24*, 431-437. doi:10.1016/S0306-4603(98)00058-6
- Martin, G. C., Brown, J. P., Eifler, C. W., & Houston, G. D. (1999). Oral leukoplakia status six weeks after cessation of smokeless tobacco use. *The Journal of the American Dental Association, 130*, 945-954. Retrieved from <http://jada.ada.org>
- McClellan, S. F., Olde, B. A., Freeman, D. H., Mann, W. F., & Rotruck, J. R. (2010). Smokeless tobacco use among military flight personnel: A survey of 543 aviators. *Aviation, Space, and Environmental Medicine, 81*, 575-580. doi:10.3357/ASEM.2317.2010
- Morgan, B. J. (2001). Evaluation of an educational intervention for military tobacco users. *Military Medicine, 166*, 1094-1098. Retrieved from <http://www.ncbi.nlm.nih.gov>
- Peterson, A. L., Severson, H. H., Andrews, J. A., Gott, S. P., Cigrang, J. A., Gordon, J. S., ... Martin, G. C. (2007). Smokeless tobacco use in military personnel. *Military Medicine, 172*, 1300-1305. Retrieved from <http://www.ingentaconnect.com>
- Reynolds, K., Williams, J., Miller, C., Mathis, A., & Dettori, J. (2000). Injuries and risk factors in an 18-day Marine winter mountain training exercise. *Military Medicine, 165*, 905-910. Retrieved from <http://www.ncbi.nlm.nih.gov>
- Rice, V. J., Mays, M. Z., & Gable, C. (2009). Self-reported health status of students in-processing into military medical advanced individual training. *Work: A Journal of Prevention, Assessment and Rehabilitation, 34*, 387-400. doi:10.3233/WOR-2009-0939
- Severson, H. H., Peterson, A. L., Andrews, J. A., Gordon, J. S., Cigrang, J. A., Danaher, B. G., ... Barckley, M. (2009). Smokeless tobacco cessation in military personnel: A randomized controlled trial. *Nicotine & Tobacco Research, 11*, 730-738. doi:10.1093/ntr/ntp057

## SMOKELESS TOBACCO USE IN THE UNITED STATES MILITARY

- Shiple, R., Tresch, K., Tracey, S., & Wilcox, A. (2002). The Buckley tobacco cessation program: Helping smokers quit. *Federal Practitioner*, 13-22. Retrieved from <http://www.fedprac.com>
- Smith, S. S., & Fiore, M. C. (1999). The epidemiology of tobacco use, dependence, and cessation in the United States. *Primary Care: Clinics in Office Practice*, 26, 433-461. doi:10.1016/S0095-4543(05)70112-3
- Sridhar, A., Deuster, P. A., Becker, W. J., Coll, R., O'Brien, K. K., & Bathalon, G. (2003). Health assessment of U.S. Army rangers. *Military Medicine*, 168, 57-62. Retrieved from <http://www.ncbi.nlm.nih.gov>
- Trent, L. K., Hilton, S. M., & Melcer, T. (2007). Premilitary tobacco use by male Marine Corps recruits. *Military Medicine*, 172, 1077-1083. Retrieved from <http://www.ingentaconnect.com>
- Vander Weg, M. W., DeBon, M., Peterson, A. L., Sherrill-Mittleman, D., Klesges, R. C., & Relyea, G. E. (2005). Prevalence and correlates of lifetime smokeless tobacco use in female military recruits. *Nicotine & Tobacco Research*, 7, 431-441. doi:10.1080/14622200500125781
- Vander Weg, M. W., Klesges, R. C., & DeBon, M. (2005). Relationship between smokeless tobacco use and body weight in young adult military recruits. *Nicotine & Tobacco Research*, 7, 301-305. doi:10.1080/14622200500056317
- Vander Weg, M. W., Peterson, A. L., Ebbert, J. O., DeBon, M., Klesges, R. C., & Haddock, C. K. (2008). Prevalence of alternative forms of tobacco use in a population of young adult military recruits. *Addictive Behaviors*, 33, 69-82. doi:10.1016/j.addbeh.2007.07.005
- Ward, K. D., Vander Weg, M. W., Klesges, R. C., Kovach, K. W., Elrod, M. C., DeBon, M., ... Lando, H. A. (2003). Characteristics of highly physically active smokers in a population of young adult military recruits. *Addictive Behaviors*, 28, 1405-1418. doi:10.1016/S0306-4603(02)00267-8
- Williams, L., Hermes, C., Gackstetter, G., Lando, H., & Fiedler, E. (1996). Prevalence of tobacco use among first-term Air Force personnel before and after basic military training. *Military Medicine*, 161, 318-323. Retrieved from <http://psycnet.apa.org>
